# Supplementary material
Source: ML conference proceedings conference paper supplement (https://openreview.net/forum?id=sHSzfA4J7p)
Supplement: supplementary_material [file attachment]

# Survey Instructions

# What you need to do?

Decide which label(s) describes the image to a satisfactory degree, in your opinion

If label1 is satisfactory, fill in 1 in the “answer” column.

If label2 is satisfactory, fill in 2 in the “answer” column.

If both labels are satisfactory, fill in 3 in the “answer” column.

If both labels are not satisfactory, fill in 4 in the “answer” column.

Example 1: “dog” obviously describes the image, but not “pie”. So we fill in “1” in the answer column.

| image                                                                             | label1 | label2 | Answer |
|-----------------------------------------------------------------------------------|--------|--------|--------|
|  | dog    | pie    | 1      |

Example 2: Both “mountain” and “lake” seem to be descriptive of the image. Thus, we may fill in 3 for the answer.

| image                                                                            | label1   | label2 | Answer |
|----------------------------------------------------------------------------------|----------|--------|--------|
|  | mountain | lake   | 3      |

Example 3: both “night” and “star” may equally describe this image. Thus, we may fill in 3 in the answer column.

| image                                                                              | label1 | label2 | Answer |
|------------------------------------------------------------------------------------|--------|--------|--------|
|  | night  | star   | 3      |

Example 4: There are two reptiles in the image but none of the labels indicates that. Thus, we may feel that both labels are not satisfactory and fill in 4 in the answer column.

| image                                                                            | label1 | label2 | Answer |
|----------------------------------------------------------------------------------|--------|--------|--------|
|  | bird   | nature | 4      |

Example 5: Despite there is “no person”, we don’t consider label1 as satisfactory because it is too general. Thus we answer 4.

| image                                                                             | label1    | label2 | Answer |
|-----------------------------------------------------------------------------------|-----------|--------|--------|
|  | No person | car    | 4      |
